1 **Short running title**

2 Far-red light regulates floral induction network

3 **Gene networks underlying faster flowering induction in response to far-red**  
4 **light**

5 **Maria Pazos-Navarro<sup>1</sup>, Federico M Ribalta<sup>1</sup>, Bhavna Hurgobin<sup>2,3</sup>, Janine S Croser<sup>1</sup> and**  
6 **Parwinder Kaur<sup>1</sup>**

7 <sup>1</sup>Centre for Plant Genetics and Breeding, UWA School of Agriculture and Environment, The  
8 University of Western Australia, 35 Stirling Hwy, Crawley, WA 6009, Australia

9 <sup>2</sup>School of Biological Sciences, The University of Western Australia, 35 Stirling Hwy,  
10 Crawley, WA 6009, Australia

11 <sup>3</sup>School of Agriculture and Food Science, The University of Queensland, St Lucia, QLD  
12 4072, Australia

13

14 Corresponding author details:

15 Maria Pazos-Navarro

16 Tel: +61 8 6488 1973

17 Email: [maria.pazosnavarro@uwa.edu.au](mailto:maria.pazosnavarro@uwa.edu.au)

18

19 **ABSTRACT**

20 Light is one of the most important signals that regulate flowering through quality, quantity  
21 and duration. The low red to far-red ratio accelerates flowering in a wide range of species.  
22 The central gene pathways for controlling flowering time, identified in arabidopsis, appear to  
23 be largely conserved in legumes. However, there are numerous examples of gene duplication  
24 and loss. The role of *CONSTANS-LIKE* genes as integrators of the photoperiod response has  
25 been questioned in several dicot species including legumes. In this study on subterranean  
26 clover, using whole-genome transcriptome profiling and controlled light spectra, we  
27 identified 13 differentially expressed genes related to light signalling, meristem identity and  
28 flowering promotion. Of these, we pinpointed genes which seem to link photoperiod and far-  
29 red light signalling coding for a CCT motif related to *CONSTANS* and a *FLOWERING*  
30 *LOCUS T b2* like protein, and their active downstream cascade. The earlier down-regulation  
31 of these genes observed under blue compared to far-red -enriched light may explain their role  
32 in floral induction. We also found contrasting responses to light quality related to  
33 reproduction and defence mechanisms. These results will contribute to a better understanding  
34 of the molecular basis of flowering in response to different light quality in long-day plants.

35 **KEYWORD INDEX**

36 Flowering, gene regulation, LED light, legumes, light quality, photoperiod, red to far-red  
37 ratio, RNA sequencing.

## 38 INTRODUCTION

39 Flowering behaviour is modified by environmental cues. Light is one of the most  
40 important signals that regulate flowering through quality, quantity and duration (Thomas  
41 2006). The genetic mechanisms involved in this response have been widely studied, but  
42 questions remain. Plants perceive subtle changes in light composition, duration and direction  
43 through photoreceptor pigments, which result in physiological and morphological  
44 modifications necessary for adaptation to environmental changes (Rajapakse & Shakak  
45 2007). In higher plants, the ‘shade avoidance syndrome’ is an adaptive developmental  
46 strategy mediated by the perception of light spectral quality (in particular the red to far-red  
47 ratio, R: FR), which acts as an early warning of potential shading (Salter *et al.* 2003; Ballaré  
48 & Pierik 2017). In arabidopsis, the most noticeable shade avoidance responses include rapid  
49 internode elongation and accelerated floral initiation at the expense of leaf expansion and  
50 chlorophyll synthesis reduction (Devlin *et al.* 1999). Similarly, research in the model long-  
51 day species pea (*Pisum sativum*) demonstrated that FR-enriched light, with an R: FR ratio  
52 below 3.5, is most effective for early floral induction (Runkle & Heins 2001; Cummings *et*  
53 *al.* 2007; Croser *et al.* 2016; Ribalta *et al.* 2017).

54 Changes in light quality are detected in the leaf by the action of a family of plant  
55 photoreceptors, including phytochromes (R and FR light receptors) and cryptochromes (blue  
56 light receptors) and involve complex gene regulatory networks (Andrés & Coupland 2012;  
57 Viczián *et al.* 2017). In *Arabidopsis thaliana* (arabidopsis), significant progress has been  
58 made toward understanding the role light quality plays on floral initiation pathways. The  
59 genes *GIGANTEA* (*GI*), *FLAVON KELCH F BOX* (*FKF1*), *CONSTANS* (*CO*) and  
60 *FLOWERING LOCUS T* (*FT*) have major regulatory roles in the promotion of flowering in  
61 response to photoperiod (Thomas 2006; Jiao *et al.* 2007). In particular, *CO* has been  
62 described as a network hub for the integration of internal and external signals into the

63 photoperiodic flowering pathway to induce *FT* expression (Wong *et al.* 2014; Shim *et al.*  
64 2017). *FT* acts as a mobile flower-promoting signal that integrates day length, light quality,  
65 circadian clock, temperature and vernalisation inputs (Turck *et al.* 2008). In legumes, the  
66 basic genes and gene families central to pathways controlling flowering time in arabidopsis  
67 appear to be largely conserved. However, there are numerous examples of gene duplication  
68 and loss (Weller & Ortega 2015). In pea, the conserved role of the arabidopsis genes *GI*,  
69 *EARLY FLOWERING 3* and *EARLY FLOWERING 4* in the regulation of *FT* genes has been  
70 demonstrated (Hecht *et al.* 2007; Liew *et al.* 2009; Weller *et al.* 2012). Orthologous  
71 arabidopsis genes play a part in the photoperiodic flowering pathway in legumes. However,  
72 the role of *CONSTANS-LIKE (COL)* genes as integrators of the photoperiod response has  
73 been questioned in several dicot species including legumes (Blackman 2017). Recent studies  
74 in *Medicago truncatula* (Medicago) revealed that none of the *COL* genes identified was  
75 functionally equivalent to *CO*, with respect to inducing *FT* expression (Wong *et al.* 2014).  
76 These findings support the idea of *CO*-independent pathways involved in flowering induction  
77 in legumes.

78 An improved understanding of the gene networks underlying flowering induction in  
79 response to light quality will require better characterisation of the transcriptome. The recent  
80 development of deep-sequencing technologies, such as RNA-Seq, has enabled the generation  
81 of a high-resolution global view of the transcriptome and its organisation for some species  
82 and cell types (Wang *et al.* 2009). Whole-transcriptome sequencing using RNA-Seq is a  
83 convenient and rapid means to study gene expression at the whole-genome level and define  
84 putative gene function (Wang *et al.* 2009; Ozsolak & Milos 2011; Singh *et al.* 2013;  
85 Hirakawa *et al.* 2016; Kaur *et al.* 2017). Rapid advances have been made toward  
86 understanding the transcriptional regulation of specific developmental processes in legumes  
87 (Benedito *et al.* 2008; Libault *et al.* 2008; Severin *et al.* 2010); we now seek to apply whole-

88 transcriptome sequencing to characterise the genetic regulatory mechanisms underlying the  
89 induction of flowering in legumes in response to changes in the R: FR ratio using light  
90 emitting diodes (LED).

91         Despite the substantial number of legumes with their genome sequenced and/or  
92 significant genomic resources such as pea, soybean (*Glycine max*), Medicago and *Lotus*  
93 *japonicus*, no legume species has emerged as a predominant model in the study of flowering  
94 time (Weller & Ortega 2015). Recently, we established subterranean clover (*Trifolium*  
95 *subterraneum* L.) as a reference species for genetic and genomic studies within the genus  
96 *Trifolium* which seems to respond well to changes in the R: FR ratio using LED.  
97 Subterranean clover is diploid ( $2n = 16$ ), predominantly inbreeding, and has a well-assembled  
98 and annotated genome with a tissue type transcriptome atlas available (Hirakawa *et al.* 2016;  
99 Kaur *et al.* 2017). Understanding the genetics of important traits in this model species can  
100 provide a pathway to understanding the genetic mechanisms in other genetically complex  
101 species.

102         Within this research, we used deep-sequencing technologies to investigate  
103 transcriptional activity under different light spectra at three time-points in the long-day plant,  
104 subterranean clover. We have previously shown the accelerated onset of flowering in a range  
105 of leguminous species under FR-enriched LED light spectra and have thus adopted this  
106 wavelength profile and compared it with a blue-enriched LED light spectra (Croser *et al.*  
107 2016; Pazos-Navarro *et al.* 2017; Ribalta *et al.* 2017). We expect that the FR-enriched spectra  
108 will accelerate the up-regulation of genes related to floral initiation. Our results will enable us  
109 to understand better the effect of FR-enriched light spectra on the gene networks regulating  
110 time to flowering.

111

## 112 MATERIALS AND METHODS

### 113 Experimental design

114 Seeds of *Trifolium subterraneum* L. cv. Daliak were nicked with a scalpel prior to sowing in  
115 70 mm plastic pots filled with steam-pasteurised potting mix (Plant Bio Mix – Richgro  
116 Garden Products Australia Pty Ltd). Plants were grown simultaneously within two walk-in  
117 phytotron rooms under tightly controlled temperatures of 24 °C day, 20 °C night and a  
118 photoperiod of 20 h, as per Ribalta *et al.* (2017). The two growth environments differed only  
119 in the spectral composition of illumination provided to the plants (Fig. 1, A and B).

120 Environment 1 (E1) illumination was provided by LED arrays enriched in the far-red part of  
121 the spectrum with a red to far-red (R: FR) ratio of 2.9 ('B series' AP67 spectrum Valoya  
122 Helsinki, Finland). Environment 2 (E2) illumination was provided by LED tubes enriched in  
123 the blue part of the spectrum with an R: FR ratio of 5.9 (108D18-V12 tubes from S-Tech  
124 Lighting, Australia). Spectral measurements were undertaken using a Sekonic C7000  
125 SpectroMaster spectrometer (Sekonic Corp., Tokyo, Japan) and values were averaged over  
126 three scans in the range of 380–780 nm. Ratio calculations followed the method of Runkle &  
127 Heins (2001) where the R: FR ratio was measured as a narrow band (655–665: 725–735 nm).  
128 Plants were watered daily and fertilised weekly with a water-soluble NPK fertiliser  
129 (15:2.2:12.4) with micronutrients (Peters Excel, Scotts Australia, Bella Vista, New South  
130 Wales) at a rate of 2 g per pot, as per Pazos-Navarro *et al.* (2017). Time to flowering was  
131 defined as the number of days from sowing to the open floral stage of the first flower and was  
132 recorded under the different growth conditions.

133 Leaf samples were collected simultaneously from E1 and E2 grown plants at three time-  
134 points (TPs) when plants in the E1 environment reached the following developmental  
135 milestones: third-leaf stage (TP1), appearance of the first flower bud (TP2) and open flower  
136 (TP3; Fig. 2A). This correlated to 14 growing days for TP1 (at this time-point, plants in both

137 environments were at the third-leaf stage), 42 growing days for TP2, and 47 growing days for  
138 TP3. Leaf tissue (75–100 mg FW) was harvested and snap-frozen in liquid nitrogen and  
139 stored at –80 °C until RNA extraction.

#### 140 **RNA isolation and library preparation**

141 Total RNA from all tissue samples was extracted using the Spectrum™ Plant Total RNA Kit  
142 (Sigma-Aldrich, St Louis, USA) following the manufacturer's instructions. Aliquots of  
143 purified RNA were stored at –80 °C. The concentration of RNA was confirmed using a Qubit  
144 fluorometer with the Qubit RNA assay kit (Life Technologies, Carlsbad, USA). The integrity  
145 of total RNA was determined by electrophoretic separation on 1.2% (w/v) denaturing agarose  
146 gels. Sequencing libraries were constructed using 500 ng of total RNA with a TruSeq®  
147 Stranded Total RNA Sample Prep Kit with Ribo-Zero (Illumina Inc., San Diego, USA)  
148 following the manufacturer's instructions. Concentrations of libraries were measured using  
149 the Qubit fluorometer with the Qubit dsDNA HS assay kit (Life Technologies, Carlsbad,  
150 USA) and Agilent high-sensitivity DNA chips (Agilent Technologies, Santa Clara, USA).  
151 The amplified libraries were pooled in equimolar amounts, and quality was assessed with  
152 Agilent high-sensitivity DNA chips (Agilent Technologies, Santa Clara, USA). All reads  
153 were pair-end sequenced using the HiSeq 2000 platform (Illumina Inc., San Diego, USA).

#### 154 **Differential gene expression analysis**

155 The sequencing quality of the Illumina reads was assessed using FastQC (Andrews 2010).  
156 The reads were quality filtered using Trimmomatic (Bolger *et al.* 2014) to remove adapter  
157 sequences. Filtered reads were mapped to the advanced genome assembly (Tsub\_Ref v2.0)  
158 (Kaur *et al.* 2017) using TopHat v2.1.1 (Trapnell *et al.* 2009) with default parameters and  
159 passing the reference annotation with the-G option. Paired-end and single-end reads were  
160 mapped separately, and the BAM files were used to calculate the read counts for each gene

161 using featureCounts (Liao *et al.* 2014) (Table S1.1 and Table S1.2). For each sample, the sum  
162 of read counts at each gene locus was taken by adding the read counts from the paired-end  
163 BAM file and single-end BAM files. Differential expression analysis was carried out on the  
164 matrix of read counts for each gene (rows) and sample (columns) using the perl script  
165 run\_DE\_analysis.pl from the Trinity v2.2.0 (Haas *et al.* 2013) suite of programs based on the  
166 edgeR method (Robinson *et al.* 2010). Volcano plots were generated for each time-point and  
167 differentially expressed genes with false discovery rate (FDR) less than 5% were output for  
168 each time-point.

### 169 **Functional characterisation and GO enrichment analyses**

170 Gene ontology (GO) enrichment was performed using the Fisher exact test as implemented in  
171 R using the topGO package (Alexa & Rahnenfuhrer 2010) with method ‘weight01’ used to  
172 adjust for multiple comparisons. Up- and down-regulated DEGs ( $\log_{2}FC > 2$  and  $FDR < 0.05$ )  
173 were considered for the analysis.

## 174 **RESULTS**

### 175 **Far-red enriched light accelerates floral onset**

176 To study the effect of light quality on time to flowering, plants were grown  
177 simultaneously in controlled environments under the same temperature (24/20 °C day/night)  
178 and photoperiod (20 h) regime, but different light spectra. Environment 1 (E1) consisted of an  
179 R: FR ratio of 2.89 (FR-enriched light) and Environment 2 (E2) consisted of an R: FR ratio of  
180 5.86 (blue-(B) enriched light). We observed a clear effect of light spectra on floral onset in  
181 subterranean clover. Time to flowering was significantly reduced ( $P < 0.001$ ) under FR-  
182 enriched light by 14 days compared to B-enriched light (Fig. 1, A and B).

183

184



## 185 **Gene response to different light spectra**

186           Given the clear effect of the FR-enriched spectrum on the acceleration of floral onset,  
187 we aimed to identify the influence of light on gene expression related to flowering induction.

### 188 *Transcriptome dynamics in response to light spectra*

189           RNA-Seq technology was used to analyse variations in gene expression related to  
190 changes in the R: FR ratio across three time-points (TP) based on the attainment of precise  
191 developmental milestones under E1 growing conditions (low R: FR ratio). This correlated to  
192 14 growing days for TP1 (third-leaf stage), 42 growing days for TP2 (pre-flowering stage  
193 under FR-enriched light) and 47 growing days for TP3 (flowering stage under FR-enriched  
194 light). From a total of 31,272 protein-coding genes identified in the subterranean clover  
195 advanced assembly Tsub\_Refv2.0 (Kaur *et al.* 2017), 644 genes were differentially expressed  
196 in response to different light spectra in at least one of the three time-points analysed (Table  
197 S2). Clear differences in the number of differentially expressed genes (DEGs) were observed  
198 in response to the light treatments (Fig. 2B; Fig. 3, A and B; Table S2). The highest number  
199 of DEGs was found at TP1 with a total of 448 genes, of which 418 were exclusively  
200 differentially expressed at this stage (93%; Table S3). Of the 448 DEGs at TP1, 241 were up-  
201 regulated and 207 were down-regulated in B-enriched light compared to FR-enriched light.  
202 At TP2, we found 156 DEGs (135 up- and 21 down-regulated) with 122 of them exclusively  
203 differentially expressed at this point (78%; Table S4). At TP3, we identified 80 DEGs (16 up-  
204 and 64 down-regulated), with 65 of them exclusively differentially expressed at this point  
205 (81%; Table S5).

206

207

## 208 **Far-red and blue-enriched lights affect different biological processes**

209 To identify the major functional biological categories represented by DEGs in  
210 response to light spectra, we performed gene ontology (GO) enrichment analysis. Changes in  
211 gene expression were seen in the three different time-points in GO terms, suggesting  
212 biological processes are differentially affected by light quality. A total of 459 (71.3%) of all  
213 DEGs were assigned GO categories corresponding to several aspects of metabolic and  
214 cellular processes, response to stress, plant defence, ion localization and transport, and  
215 flowering-related processes among others (Table S6a–c).

216 When analysing DEGs in both environments at TP1, the most significantly enriched  
217 GO categories with respect to up-regulated genes (p-value < 0.05) were related to defence  
218 response, mainly to biotic stimuli such as bacteria or fungus (Table S6a). Some of those  
219 genes were related to flavonoid pathways (Tsub\_g874 and Tsub\_g13273) and LRR disease  
220 resistance related proteins (Tsub\_g14165, Tsub\_g23725 and Tsub\_g6245; Table S3). On the  
221 other hand, the GO terms related to ‘ion transport’ and floral development were  
222 predominantly associated with down-regulated genes in TP1 (Table S6a). Related to the red  
223 light signalling category, a CCT motif protein (Tsub\_g7401) was down-regulated under B-  
224 enriched light. Most of the genes identified in the floral development categories were MAD-  
225 box proteins (Tsub\_g15483, Tsub\_g25875, Tsub\_g21607 and Tsub\_g3280; Table S3).

226 At TP2, biological processes related to nodulation (GO: 0009877), defence response  
227 (GO: 0006952), and vegetative to reproductive transition (GO: 00110228) were up-regulated  
228 in B-enriched light compared to FR-enriched light. In contrast, genes involved in the  
229 secondary compound biosynthesis of isoflavonoids and flavonoids (GO: 0009717 and GO:  
230 0009813) and anthocyanin-containing compounds (GO: 0009718) were down-regulated  
231 (Tables S4 and S6b).

232 At TP3, genes associated with biological processes related to photoperiodism,  
233 flowering (GO: 2000028 and GO: 0048573) and developmental vegetative growth (GO:  
234 0080186) were up-regulated under B-enriched light, and therefore their expression was lower  
235 under FR-enriched light (Table S6c). We found that TSub\_g17978 was the same gene  
236 involved in those biological processes (Table S5). On the other hand, genes associated with  
237 the response to stress (GO: 0006950) were down-regulated. Additionally, we found other  
238 categories related to stress response: high light intensity (GO: 0009644), response to  
239 hydrogen peroxide (GO: 0042542), L-proline biosynthetic process (GO: 0055129), and  
240 detection of visible light (GO: 0009584; Table S6c).

#### 241 **Far-red enriched light promotes the floral induction network**

242 The expression of genes related to flowering promotion across species occurred at an  
243 earlier stage of plant development under FR-enriched light than B-enriched light. We  
244 identified 13 DEGs related to light signalling, meristem identity and flowering promotion, of  
245 which ten were exclusively expressed at TP1, one at TP2 and two at TP3. One of the DEGs  
246 was shared between TP1 and TP2 (Table 1). All of the flowering-related DEGs identified at  
247 TP1 were down-regulated under B-enriched light, as their expression was higher under FR-  
248 enriched light. Of those, we found a gene-coding protein related to light signalling, a CCT  
249 motif protein (TSub\_g7401), and an uncharacterised protein identified as a probable  
250 serine/threonine-protein kinase (with no lysine kinase 5-*WKN5*; TSub\_g11956). Additionally,  
251 we observed five different MADS-box transcription factors involved in floral promotion  
252 (TSub\_g15483, TSub\_g21607, TSub\_g3280, TSub\_g25875 and TSub\_g20101; Tables I and  
253 Table S2). The floral promoter TSub\_g12538, which is a possible pea *FLOWERING LOCUS*  
254 *T b2* (*Ftb2*), was among the down-regulated genes. Gene-coding proteins potentially linked  
255 with floral promotion were also identified: an uncharacterised protein (TSub\_g22633), a  
256 possible *GIBBERELLIN 20 OXIDASE 2* (*GAS20OX2*) involved in the promotion of floral

257 transition, a sugar transporter (TSub\_g15042), possible *SUCROSE-PROTON SYMPORTER 2*  
258 (*SUC2*), and a homeobox related protein that may be related to meristem identity  
259 (TSub\_g491; Table 1 and Table S2).

260 All of the DEGs related to flowering induction identified at TP2 and TP3 were up-  
261 regulated under B-enriched light. At TP2, one DEG was identified, a MADS-box protein  
262 (TSub\_g20101). Subsequently, at TP3, we found two DEGs associated with flowering  
263 promotion factors (TSub\_g30315 and TSub\_g30317; Fig. 4 and Table 1).

## 264 **DISCUSSION**

265 For the first time, we have shown that growing plants under FR light accelerates the  
266 up-regulation of genes related to floral initiation pathways using the long-day plant  
267 subterranean clover as a model. We identified novel genes which link photoperiod and FR-  
268 light signalling in addition to the up-regulation of genes related to plant defence under B-  
269 enriched light.

270 RNA-Seq time-course analysis identified 13 DEGs related to light signalling,  
271 meristem identity and flowering promotion. There was clear evidence in the transcriptome of  
272 up-regulation of gene networks related to flowering at a very early stage of plant growth  
273 (TP1, third-leaf stage) when plants were grown under FR-enriched light. Under B-enriched  
274 light, the up-regulation of this network was not expressed until TP2 and TP3 when the  
275 expression of *AGL12* and floral promoting factors was identified. These results are in  
276 accordance with the acceleration of time to flowering observed under FR-enriched light (low  
277 R: FR ratio; 14 days faster) compared to B-enriched light (high R: FR ratio).

278 The genetic link for the integration of photoperiod, light perception and circadian  
279 clock pathways has been well characterised in arabidopsis and involves the B-box  
280 transcription factor *CO*. The floral promoter *CO* protein is up-regulated by long-day growing

281 conditions and its expression is stabilised by FR light through *PHYTOCHROME A* activity  
282 (Kim *et al.* 2008; Pin & Nilsson 2012; Song *et al.* 2013). For temperate legumes (such as  
283 subterranean clover), it has been suggested that the integration of responses to day length and  
284 light quality may not be regulated by *CO*-like (*COL*) genes (Wong *et al.* 2014; Weller &  
285 Ortega 2015). These findings support our results as we identified a CCT motif protein  
286 (TSub\_g7401) at an early growing stage (TP1) under FR-enriched light. The presence of a  
287 conserved domain within the *CO* family of transcription factors in arabidopsis (Strayer *et al.*  
288 2000; Datta *et al.* 2006) suggests that the same protein is present in subterranean clover from  
289 the *COL* family. In addition, we identified a serine/threonine-protein kinase (TSub\_g11956),  
290 *WNK5* involved in regulating time to flowering in response to photoperiod in arabidopsis  
291 (Wang *et al.* 2008). Our results, therefore, suggest that floral initiation under FR-enriched  
292 light is mediated by *CO*-like and *WNK5*-like proteins.

293         The *CO* protein has a role in activating the expression of *FT* (Kim *et al.* 2008). *FT*-  
294 like proteins from several species function similarly to *FT* with respect to induction of  
295 flowering, transport in phloem, and interaction with *FLOWERING LOCUS D*-like proteins  
296 (Hecht *et al.* 2011). In our experiment, at TP1 under FR-enriched light, we found a gene-  
297 coding protein (TSub\_g12538) homologous of a pea *FTb2*. This protein is expressed  
298 specifically in pea and Medicago leaves under long days and meets the characteristics of the  
299 classical ‘florigen’ (Weller & Ortega 2015). Based on our results, it is not clear if the  
300 promoting effect of the *WNK5*-like protein on *FTb2* is direct or indirect through *COL* and  
301 further work is suggested in this area.

302         Downstream in the photoperiod pathway, we identified four MADS-box transcription  
303 factors exclusively expressed at TP1 under FR-enriched light (TSub\_g15483, TSub\_g21607,  
304 TSub\_g3280, and TSub\_g20101). We also identified one MAD-box TF (AGL12) that was

305 up-regulated at TP1 under FR-enriched light and not identified until TP2 under B-enriched  
306 light (TSub\_g25875). These TFs have been identified as key components of the networks that  
307 control the transition from vegetative to flowering and flower development in arabidopsis  
308 (Tapia-López *et al.* 2008). These flowering promoters are homologous to *AGAMOUS-LIKE*  
309 (*AGL*) MADS-box proteins: *AGL4*, *AGL6*, *AGL8*, *AGL12* and *AGL20*. *AGL8* promotes floral  
310 determination in response to FR-enriched light (Hempel *et al.* 1997). *AGL20* has been  
311 described as an integrator of the vernalisation, autonomous and photoperiod pathways  
312 controlling flowering in arabidopsis (Lee *et al.* 2000). It has also been associated with  
313 gibberellins in the induction of flowering (Moon *et al.* 2003). *AGL12* has been described as  
314 an important floral promoter through the up-regulation of *AGL20* (Tapia-López *et al.* 2008).  
315 The expression of *AGL4* and *AGL6* is associated with gene regulation during floral meristem  
316 and floral organ development, with both found mainly in flowers (Ma *et al.* 1991; Pelaz *et al.*  
317 2000; Dreni & Zhang 2016). The fact that *AGL12* was found at TP1 under FR-enriched light  
318 and at TP2 under B-enriched light provides further evidence that FR-enriched spectra  
319 accelerate flowering induction.

320 In addition to the DEGs related to the photoperiod flowering pathway and  
321 downstream cascade, we identified a further three DEGs related to flowering at TP1 under  
322 FR-enriched light: TSub\_g491, TSub\_g22633 and TSub\_g15042. The TSub\_g491 gene-  
323 coding protein is a homolog of the *KNAT1* protein and involved in the development of both  
324 vegetative and reproductive meristems (Scofield *et al.* 2007; Aguilar-Martinez *et al.* 2015).  
325 The TSub\_g22633 is homologous to *GAS20OX2*, which is involved in the promotion of floral  
326 transition in arabidopsis (Andrés *et al.* 2014). The TSub\_g15042 is a sugar transporter, *SUC2*  
327 involved in the transport of *FT* through phloem companion cells in leaves to the meristem for  
328 the induction of floral organ formation (Corbesier *et al.* 2007). At the later growing time-  
329 points (TP2 and TP3), only three genes were exclusively differentially expressed under B-

330 enriched light. At TP2, we identified a gibberellin-related protein (TSub\_15579) homologous  
331 to *AT5G14920*, which is thought to be related to flowering induction in arabidopsis over-  
332 expressing the *ZEITLUPE/LOV KELCH PROTEIN 1*, a blue light photoreceptor (Saitoh *et al.*  
333 2015). At TP3, we found two genes (TSub\_g30315 and TSub\_g30317) described as  
334 homologs of flowering-promoting factor-like proteins in Medicago. The fact that genes  
335 related to reproductive processes were identified at TP1 under FR-enriched light and at TP2  
336 and TP3 under B-enriched light is in accordance with the accelerated flowering observed  
337 under a low R: FR ratio.

338           Interestingly, we found contrasting responses to light quality related to reproduction  
339 and defence mechanisms. In our experiment, at TP1 and TP2, growing plants under B-  
340 enriched light (high R: FR ratio) enhanced the expression of genes involved in flavonoid and  
341 anthocyanins pathways. At TP3, we found down-regulation of genes related to L-proline  
342 biosynthetic process, which is involved in the response to abiotic stress (Devlin 2016). This is  
343 in agreement with studies indicating that plant health responses are modulated by B-enriched  
344 and FR-enriched light. For example, B-enriched light can enhance the production of  
345 secondary metabolites like flavonoids and anthocyanins, which are defensive compounds  
346 against fungus, bacteria and environmental stresses (Johkan *et al.* 2010). Similarly, plants  
347 grown under FR-enriched light (low R: FR ratio) can express a weak defence phenotype  
348 (Cerrudo *et al.* 2012; Ballaré 2014). Our findings provide further support that the stress  
349 response is active under FR-enriched light, which may be due to the preferential allocation of  
350 resources to reproduction over defence.

351           The results from this study will contribute to a better understanding of the molecular  
352 basis of flowering and the possible negative correlation between reproductive and defence  
353 mechanisms in response to different light quality in long-day plants. Using RNA-Seq and

354 tightly controlled light spectra, we have identified key genes which link photoperiod and FR-  
355 light signalling coding for a CCT motif and an *FTb2*-like protein, and the active downstream  
356 cascade. The earlier down-regulation of these genes observed under B-enriched light  
357 compared to FR-enriched light may explain their role in the acceleration of floral onset.

### 358 **ACKNOWLEDGMENTS**

359 This work was supported by the grant-in-aid funding awarded to Dr Kaur by the AW Howard  
360 Memorial Trust Inc. We thank Mr R. Creasy, Mr B. Piasini and Mr L. Hodgson for  
361 glasshouse expertise and Ms S. Wells for technical assistance. We acknowledge the  
362 supercomputing resources provided by the Pawsey Supercomputing Centre with funding  
363 from the Australian Government and the Government of Western Australia.

364



## 365 REFERENCES

- 366 Aguilar-Martinez J.A., Uchida N., Townsley B., West D.A., Yanez A., Lynn N., ..., Neelima  
367 S. (2015) Transcriptional, posttranscriptional, and posttranslational regulation of  
368 SHOOT MERISTEMLESS gene expression in Arabidopsis determines gene function in  
369 the shoot apex. *Plant Physiology* **167**, 424–442.
- 370 Alexa A. & Rahnenfuhrer J. (2010) topGO: enrichment analysis for gene ontology. R  
371 package. Version 2.
- 372 Andrés F. & Coupland G. (2012) The genetic basis of flowering responses to seasonal cues.  
373 *Nature Reviews Genetics* **13**, 627–639.
- 374 Andrés F., Porri A., Torti S., Mateos J., Romera-Brachat M., Garcias-Martinez J.L.,  
375 ...Coupland G. (2014) SHORT VEGETATIVE PHASE reduces gibberellin  
376 biosynthesis at the Arabidopsis shoot apex to regulate the floral transition. *Proceedings*  
377 *of the National Academy of Sciences of the United States of America* **111**, E2760–  
378 E2769.
- 379 Andrews S. (2010) FastQC: A quality control tool for high throughput sequence data.  
380 <http://www.bioinformatics.babraham.ac.uk/projects/fastqc/>
- 381 Ballaré C.L. (2014) Light regulation of plant defense. *Annual Review of Plant Biology* **65**,  
382 335–363.
- 383 Ballaré C.L. & Pierik R. (2017) The shade-avoidance syndrome: multiple signals and  
384 ecological consequences. *Plant, Cell & Environment* doi: 10.1111/pce.12914
- 385 Benedito V.A., Torres-Jerez I., Murray J.D., Andrianakaja A., Allen S., Kakar K., ..., Udvardi  
386 M.K. (2008) A gene expression atlas of the model legume *Medicago truncatula*. *Plant*  
387 *Journal* **55**, 504–513.
- 388 Blackman B.K. (2017) Changing responses to changing seasons: natural variation in the  
389 plasticity of flowering time. *Plant Physiology* **173**, 16–26.
- 390 Bolger A.M., Lohse M. & Usadel B. (2014) Trimmomatic: a flexible trimmer for Illumina  
391 sequence data. *Bioinformatics* **30**, 2114–2120.
- 392 Cerrudo I., Keller M.M., Cargnel M.D., Demkura P.V., de Wit M., Patitucci M.S., ..., Ballaré  
393 C.L. (2012) Low red/far-red ratios reduce Arabidopsis resistance to Botrytis cinerea  
394 and jasmonate responses via a COI1-JAZ10-dependent, salicylic acid-independent  
395 mechanism. *Plant Physiology* **158**, 2042–2052.
- 396 Corbesier L., Vincent C., Jang S., Fornara F., Fan Q., Searle I., ..., Coupland G. (2007) FT  
397 protein movement contributes to long-distance signalling in floral induction of  
398 Arabidopsis. *Science* **316**, 1030–1033.
- 399 Croser J.S., Pazos-Navarro M., Bennett R.G., Tschirren S., Edwards K., Erskine W., ...,  
400 Ribalta FM (2016) Time to flowering of temperate pulses *in vivo* and generation  
401 turnover *in vivo–in vitro* of narrow-leaf lupin accelerated by low red to far-red ratio and  
402 high intensity in the far-red region. *Plant Cell, Tissue and Organ Culture* **127**, 591–  
403 599.
- 404 Cummings I.G., Reid J.B. & Koutoulis A. (2007) Red to far-red ratio correction in plant  
405 growth chambers—growth responses and influence of thermal load on garden pea.  
406 *Physiologia Plantarum* **131**, 171–179.
- 407 Datta S., Hettiarachchi G.H.C.M., Deng X.W. & Holm M. (2006) Arabidopsis CONSTANS-  
408 LIKE3 is a positive regulator of red light signaling and root growth. *The Plant Cell* **18**,  
409 70–84.
- 410 Devlin P.F. (2016) Plants wait for the lights to change red. *Proceedings of the National*  
411 *Academy of Sciences of the United States of America* **113**, 7301–7303.

- 412 Devlin P.F., Robson P.R., Patel S.R., Goosey L., Sharrock R.A. & Whitelam G.C. (1999)  
413 Phytochrome D acts in the shade-avoidance syndrome in Arabidopsis by controlling  
414 elongation growth and flowering time. *Plant Physiology* **119**, 909–916.
- 415 Dreni L. & Zhang D. (2016) Flower development: the evolutionary history and functions of  
416 the AGL6 subfamily MADS-box genes. *Journal of Experimental Botany* **67**, 1625–  
417 1638.
- 418 Haas B.J., Papanicolaou A., Yassour M., Grabherr M., Blood P.D., Bowden J., ..., Lieber M.  
419 (2013) De novo transcript sequence reconstruction from RNA-seq using the Trinity  
420 platform for reference generation and analysis. *Nature Protocols* **8**, 1494–1512.
- 421 Hecht V., Knowles C.L., Vander Schoor J.K., Liew L.C., Jones S.E., Lambert M.J. & Weller  
422 J.L. (2007) Pea LATE BLOOMER1 is a GIGANTEA ortholog with roles in  
423 photoperiodic flowering, deetiolation, and transcriptional regulation of circadian clock  
424 gene homologs. *Plant Physiology* **144**, 648–661.
- 425 Hecht V., Laurie R.E., Vander Schoor J.K., Ridge S., Knowles C.L., Liew L.C., ..., Weller  
426 J.L. (2011) The Pea GIGAS gene is a FLOWERING LOCUS T homolog necessary for  
427 graft-transmissible specification of flowering but not for responsiveness to photoperiod.  
428 *The Plant Cell* **23**, 147–161.
- 429 Hempel F.D., Weigel D., Mandel M.A., Ditta G., Zambryski P.C., Feldman L.J. & Yanofsky  
430 M.F. (1997) Floral determination and expression of floral regulatory genes in  
431 Arabidopsis. *Development* **124**, 3845–3853.
- 432 Hirakawa H., Kaur P., Shirasawa K., Nichols P., Nagano S., Appels R., ..., Isobe S.N. (2016)  
433 Draft genome sequence of subterranean clover, a reference for genus Trifolium. *Science*  
434 *Reports* **6**. doi: 10.1038/srep30358
- 435 Jiao Y., Lau O.S. & Deng X.W. (2007) Light-regulated transcriptional networks in higher  
436 plants. *Nature Reviews Genetics* **8**, 217–230.
- 437 Johkan M., Shoji K., Goto F., Hashida S. & Yoshihara T. (2010) Blue light-emitting diode  
438 light irradiation of seedlings improves seedling quality and growth after transplanting in  
439 red leaf lettuce. *Hortscience* **12**, 1809–1814.
- 440 Kaur P., Bayer P.E., Milec Z., Vrána J., Yuan Y., Appels R., ..., Doležel J. (2017) An  
441 advanced reference genome of *Trifolium subterraneum* L. reveals genes related to  
442 agronomic performance. *Plant Biotechnology Journal* **15**, 1034–1046.
- 443 Kim S.Y., Yu X. & Michaels S.D. (2008) Regulation of CONSTANS and FLOWERING  
444 LOCUS t expression in response to changing light quality. *Plant Physiology* **148**, 269–  
445 279.
- 446 Lee H., Suh S., Park E., Cho E., Ahn J.H., Kim S., ..., Lee I. (2000) The AGAMOUS-LIKE  
447 20 MADS domain protein integrates floral inductive pathways in Arabidopsis. *Genes &*  
448 *Development* **14**, 2366–2376.
- 449 Liao Y., Smyth G.K. & Shi W. (2014) featureCounts: an efficient general purpose program  
450 for assigning sequence reads to genomic features. *Bioinformatics* **30**, 923–930.
- 451 Libault M., Thibivilliers S., Bilgin D.D., Radwan O., Benitez M., Clough S.J. & Stacey G.  
452 (2008) Identification of four soybean reference genes for gene expression  
453 normalization. *Plant Genome* **1**, 44–54.
- 454 Liew L.C., Hecht V., Weeden N.F. & Weller J.L. (2009) Isolation of Pseudo Response  
455 Regulator genes and evaluation as candidate genes for photoperiod response loci.  
456 *Pisum Genetics* **41**, 21–25.
- 457 Ma H., Yanofsky M.F. & Meyerowitz E.M. (1991) AGL1-AGL6, an Arabidopsis gene  
458 family with similarity to floral homeotic and transcription factor genes. *Genes &*  
459 *Development* **5**, 484–495.

- 460 Moon J., Suh S., Lee H., Choi K., Hong C.B., Paek N., ..., Lee I. (2003) The SOC1 MADS-  
461 box gene integrates vernalization and gibberellin signals for flowering in Arabidopsis.  
462 *Plant Journal* **35**, 613–623.
- 463 Oszolak F. & Milos P.M. (2011) RNA sequencing: advances, challenges and opportunities.  
464 *Nature Reviews Genetics* **12**, 87–98.
- 465 Pazos-Navarro M., Castello M., Bennett R.G., Nichols P. & Croser J. (2017) *In vitro*-assisted  
466 single seed descent for breeding cycle compression in subterranean clover (*Trifolium*  
467 *subterraneum* L.). *Crop & Pasture Science*. doi: 10.1071/CP17067
- 468 Pelaz S., Ditta G.S., Baumann E., Wisman E. & Yanofsky M.F. (2000) B and C floral organ  
469 identity functions require SEPALLATA MADS-box genes. *Nature* **405**, 200–203.
- 470 Pin P.A. & Nilsson O. (2012) The multifaceted roles of FLOWERING LOCUS T in plant  
471 development. *Plant, Cell & Environment* **35**, 1742–1755.
- 472 Rajapakse N.C. & Shahak Y. (2007) Light quality manipulation by horticulture industry. In  
473 Annual Plant Reviews Volume 30: Light and Plant Development (eds G. C. Whitelam  
474 & K. J. Halliday), pp. 290–312. Blackwell Publishing Ltd, Oxford.
- 475 Ribalta F.M., Pazos-Navarro M., Nelson K., Edwards K., Ross J.J., Bennett R.G., ..., Croser  
476 J.S. (2017) Precocious floral initiation and identification of exact timing of embryo  
477 physiological maturity facilitate germination of immature seeds to truncate the lifecycle  
478 of pea. *Plant Growth Regulation* **81**, 345–353.
- 479 Robinson M.D., McCarthy D.J. & Smyth G.K. (2010) edgeR: a Bioconductor package for  
480 differential expression analysis of digital gene expression data. *Bioinformatics* **26**, 139–  
481 140.
- 482 Runkle E.S. & Heins R.D. (2001) Specific functions of red, far red, and blue light in  
483 flowering and stem extension of long-day plants. *Journal of the American Society for*  
484 *Horticultural Science* **126**, 275–282.
- 485 Saitoh A., Takase T., Kitaki H., Miyazaki Y. & Kiyosue T. (2015) Gene expression profile of  
486 zeitlupe/lov kelch protein1 T-DNA insertion mutants in *Arabidopsis thaliana*:  
487 Downregulation of auxin-inducible genes in hypocotyls. *Plant Signaling & Behavior*  
488 **10**. doi: 10.1080/15592324.2015.1071752
- 489 Salter M.G., Franklin K.A. & Whitelam G.C. (2003) Gating of the rapid shade-avoidance  
490 response by the circadian clock in plants. *Nature* **426**, 680–683.
- 491 Scofield S., Dewitte W. & Murray J.A.H. (2007) The KNOX gene SHOOT  
492 MERISTEMLESS is required for the development of reproductive meristematic tissues  
493 in *Arabidopsis*. *Plant Journal* **50**, 767–781.
- 494 Severin A.J., Woody J.L., Bolon Y.T., Joseph B., Diers B.W., Farmer A.D., ..., Shoemaker  
495 R.C. (2010) RNA-Seq atlas of *Glycine max*: a guide to the soybean transcriptome. *BMC*  
496 *Plant Biology* **10**, 160.
- 497 Shim J.S., Kubota A. & Imaizumi T. (2017) Circadian clock and photoperiodic flowering in  
498 Arabidopsis: CONSTANS is a hub for signal integration. *Plant Physiology* **173**, 5–15.
- 499 Singh A.M., Chappell J., Trost R., Lin L., Wang T., Tang J., ..., Dalton S. (2013) Cell-cycle  
500 control of developmentally regulated transcription factors accounts for heterogeneity in  
501 human pluripotent cells. *Stem Cell Reports* **1**, 532–544.
- 502 Song Y.H., Ito S. & Imaizu T. (2013) Flowering time regulation: photoperiod- and  
503 temperature-sensing leaves. *Trends in Plant Science* **18**, 575–583.
- 504 Strayer C., Oyama T., Schultz T.F., Raman R., Somers D.E., Más P., ..., Kay S.A. (2000)  
505 Cloning of the Arabidopsis clock gene TOC1, an autoregulatory response regulator  
506 homolog. *Science* **289**, 768–771.
- 507 Tapia-López R., Garcia-Ponce B., Dubrosky J.G., Garay-Arroyo A., Perez-Ruiz R.V., Kim  
508 S., ..., Alvarez-Buylla E.R. (2008) An AGAMOUS-related MADS-box gene, XAL1

- 509 (AGL12), regulates root meristem cell proliferation and flowering transition in  
510 Arabidopsis. *Plant Physiology* **146**, 1182–1192.
- 511 Thomas B. (2006) Light signals and flowering. *Journal of Experimental Botany* **57**, 3387–  
512 3393.
- 513 Trapnell C., Pachter L. & Salzberg S.L. (2009) TopHat: discovering splice junctions with  
514 RNA-Seq. *Bioinformatics* **25**, 1105–1111.
- 515 Turck F., Fornara F. & Coupland G. (2008) Regulation and identity of florigen:  
516 FLOWERING LOCUS T moves center stage. *Annual Review of Plant Biology* **59**, 573–  
517 594.
- 518 Viczián A., Klose C., Ádám É. & Nagy F. (2017) New insights of red light-induced  
519 development. *Plant, Cell & Environment* doi: 10.1111/pce.12880
- 520 Wang Y., Liu K., Liao H., Zhuang C., Ma H. & Yan X. (2008) The plant WNK gene family  
521 and regulation of flowering time in Arabidopsis. *Plant Biology* **10**, 548–562.
- 522 Wang Z., Gerstein M. & Snyder M. (2009) RNA-Seq: a revolutionary tool for  
523 transcriptomics. *Nature Reviews Genetics* **10**, 57–63.
- 524 Weller J.L., Liew L.C., Hecht V.F., Rajandran V., Laurie R.E., Ridge S., ..., Lejeune-Hénaut  
525 I. (2012) A conserved molecular basis for photoperiod adaptation in two temperate  
526 legumes. *Proceedings of the National Academy of Sciences of the United States of*  
527 *America* **109**, 21158–21163.
- 528 Weller J.L. & Ortega R. (2015) Genetic control of flowering time in legumes. *Frontiers in*  
529 *Plant Science* **6**, 207.
- 530 Wong A.C.S., Hecht V.F.G., Picard K., Diwadkar P., Laurie R., Wen J., ..., Weller J.L.  
531 (2014) Isolation and functional analysis of CONSTANS-LIKE genes suggests that a  
532 central role for CONSTANS in flowering time control is not evolutionary conserved in  
533 *Medicago truncatula*. *Frontiers in Plant Science* **5**, 486.
- 534

535 **Table 1.** LogFC > 2 [FRD < 0.05] of up- and down-regulated flowering-related genes  
 536 identified at each time-point when comparing blue-enriched with far-red enriched lights. ns =  
 537 not significant

| Gene ID            | Functional annotation                                                                                                                                                                              | logFC > 2 [FRD < 0.05] |              |              |
|--------------------|----------------------------------------------------------------------------------------------------------------------------------------------------------------------------------------------------|------------------------|--------------|--------------|
|                    |                                                                                                                                                                                                    | Time-point 1           | Time-point 2 | Time-point 3 |
| <i>TSub_g7401</i>  | CCT motif protein: conserved domain related to <i>CONSTANS</i> and <i>CONSTANS</i> -like proteins                                                                                                  | -3.576                 | ns           | ns           |
| <i>TSub_g11956</i> | With no lysine (K) kinase 5 ( <i>WNK5</i> ): It may regulate flowering time by modulating the photoperiod pathway                                                                                  | -2.773                 | ns           | ns           |
| <i>TSub_g12538</i> | <i>FLOWERING LOCUS T b2 (FTb2)</i> : probable floral promoter                                                                                                                                      | -4.54                  | ns           | ns           |
| <i>TSub_g25875</i> | <i>AGAMOUS</i> -like 20 ( <i>AGL20</i> ): Transcription activator active in flowering time control                                                                                                 | -2.977                 | ns           | ns           |
| <i>TSub_g15483</i> | <i>AGAMOUS</i> -like 8 ( <i>AGL8</i> ): Probable transcription factor that promotes early floral meristem identity                                                                                 | -3.47                  | ns           | ns           |
| <i>TSub_g21607</i> | <i>AGAMOUS</i> -like 4 ( <i>AGL4</i> ): Probable transcription factor that could be involved in genes regulation during floral meristem development                                                | -7.996                 | ns           | ns           |
| <i>TSub_g3280</i>  | <i>AGAMOUS</i> -like 6 ( <i>AGL6</i> ): Probable transcription factor that could be involved in genes regulation during floral meristem development                                                | -6.786                 | ns           | ns           |
| <i>TSub_g20101</i> | <i>AGAMOUS</i> -like 12 ( <i>AGL12</i> ): Probable transcription activator that may act as promoter of the flowering transition through up-regulation of <i>AGL20</i> , <i>FT</i> and <i>LEAFY</i> | -7.263                 | 3.103        | ns           |
| <i>TSub_g491</i>   | Homeobox protein knotted-1-like 1 ( <i>KNAT1</i> ): It may play a role in meristem function for transition from vegetative to reproductive development                                             | -2.268                 | ns           | ns           |
| <i>TSub_g22633</i> | <i>GIBBERELLIN 20 OXIDASE 2 (GAS20OX2)</i> : It is a key oxidase enzyme in the biosynthesis of gibberellin involved in the promotion of the floral transition                                      | -2.538                 | ns           | ns           |
| <i>TSub_g15042</i> | <i>SUCROSE- PROTON SYMPORTER 2 (SUC2)</i> : Responsible for the transport of sucrose into the cell, with the concomitant uptake of protons. Related to the florigen                                | -3.32                  | ns           | ns           |
| <i>TSub_g30315</i> | Flowering promoting factor                                                                                                                                                                         | ns                     | ns           | 3.833        |
| <i>TSub_g30317</i> | Flowering promoting factor                                                                                                                                                                         | ns                     | ns           | 4.291        |

538

539



540 **Figure 1.** A. Light spectrum profiles (wavelength (nm) vs. photon flux density (PFD,  $\mu\text{mol}$   
541  $\text{m}^{-2} \text{s}^{-1}$ ). B. Time to flowering of *Trifolium subterraneum* plants and spectral characteristics  
542 (PFD,  $\mu\text{mol m}^{-2} \text{s}^{-1}$ ) of the environments used in this study. E1: far-red enriched light (AP67  
543 LED lights, Valoya, Finland); E2: blue-enriched LED light (108D18-V12 tubes, S-Tech  
544 Lighting, Australia). The red to far-red ratio calculations followed the method of Runckle and  
545 Heins (2001): photon irradiance between 655 and 665 nm/ photon irradiance between 725  
546 and 735 nm.

547 **Figure 2.** A. Time-points (TP) selected for this study based on when plants in the E1  
548 environment attained the following developmental milestones: third-leaf stage (TP1),  
549 appearance of the first flower bud (TP2), open flower (TP3). B. Volcano plots for the  
550 differentially expressed genes. The red dots represent genes with  $\log\text{FC} > 2$  [ $\text{FDR} < 0.05$ ]  
551 whereas the green dots represent genes  $\log\text{FC} > 4$  [ $\text{FDR} < 0.05$ ].

552 **Figure 3.** A. The number of genes differentially regulated depending on the light provided.  
553 Red represents genes up-regulated and blue represents genes down-regulated under blue-  
554 enriched lights at the different time-points (TP) selected in this study when plants in the E1  
555 environment attained the following developmental milestones: third-leaf stage (TP1),  
556 appearance of the first flower bud (TP2), open flower (TP3). B. Gene expression differences  
557 for genes with  $\text{FDR} < 0.05$  and  $\log\text{FC} > 2$ . The Venn diagram presents the number of genes  
558 that are exclusively differentially expressed at each developmental stage, with the  
559 overlapping regions showing the number of genes that are differentially expressed at two or  
560 more developmental stages.

561 **Figure 4.** Differentially expressed genes related to flowering induction by different light  
562 spectra. A Genes identified at time-point 1 (TP1) when plants reached third-leaf stage, these  
563 genes were down-regulated under blue-enriched light (high R: FR). B. Genes identified at

564 time-points 2 (TP2) and 3 (TP3), these genes were up-regulated under blue-enriched light  
565 (high R: FR). *CRY*: cryptochrome, *PHYA*: phytochrome A, *PHYB*: phytochrome B, CCT:  
566 CCT motif protein, *KNAT1*: homeobox protein knotted-1-like 1, *AGL8*: *AGAMOUS*-like 8,  
567 *FTb2*: *FLOWERING LOCUS T b2*, *SUC2*: sucrose-proton symporter 2, *AGL4*: *AGAMOUS*-  
568 like 4, *AGL6*: *AGAMOUS*-like 6, *AGL20*: *AGAMOUS*-like 20, *AGL12*: *AGAMOUS*-like 12,  
569 *WNK5*: with no lysine (K) kinase, *GAS20OX2*: gibberellin 20 oxidase 2, FP1 and FP2:  
570 flowering promoters.

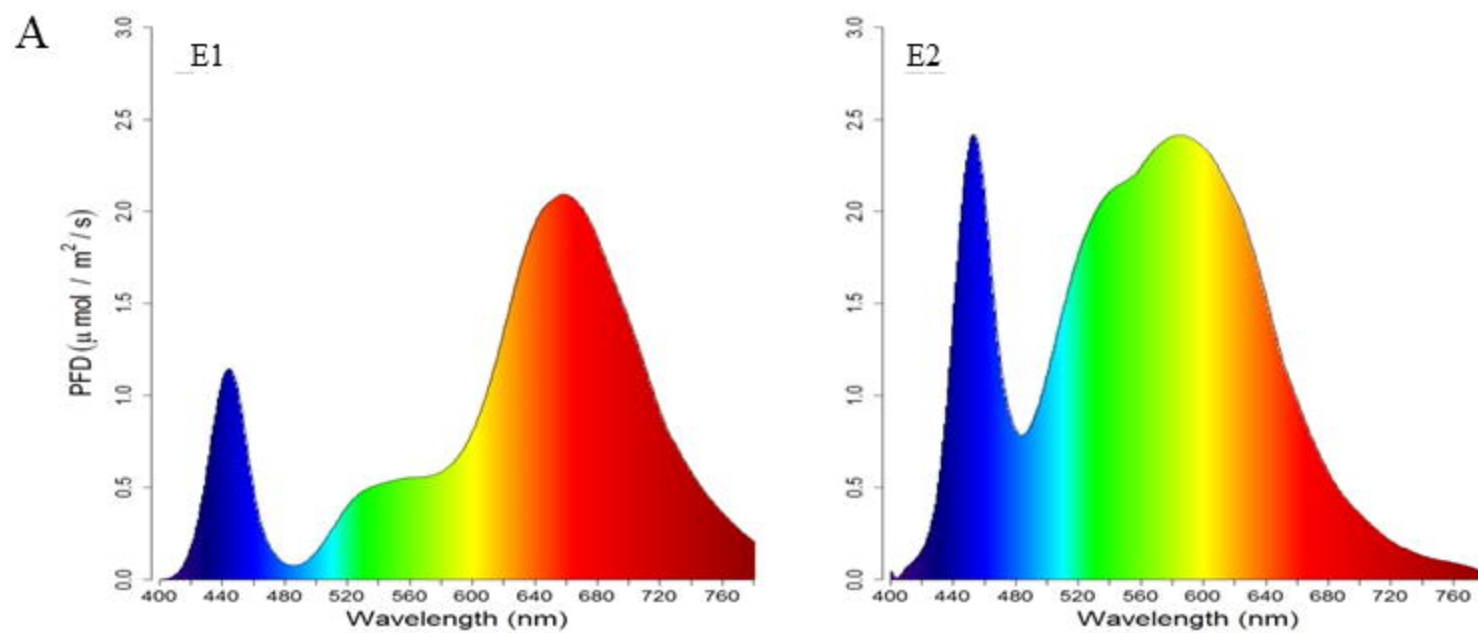

**B**

|                           | <b>E1</b>      | <b>E2</b>      |
|---------------------------|----------------|----------------|
| <b>Blue</b>               | 38.1           | 99.7           |
| <b>Red</b>                | 168.3          | 129.6          |
| <b>Far red</b>            | 52.9           | 12.5           |
| <b>Total intensity</b>    | 310            | 450            |
| <b>Red: Far red ratio</b> | 2.89           | 5.86           |
| <b>Time to flowering</b>  | 46.5 $\pm$ 1.4 | 60.7 $\pm$ 2.2 |
| <b>F value**</b>          | 582.69***      |                |

\*One-way ANOVA, F value and significance for flowering time at \*\* $P \leq 0.001$



A

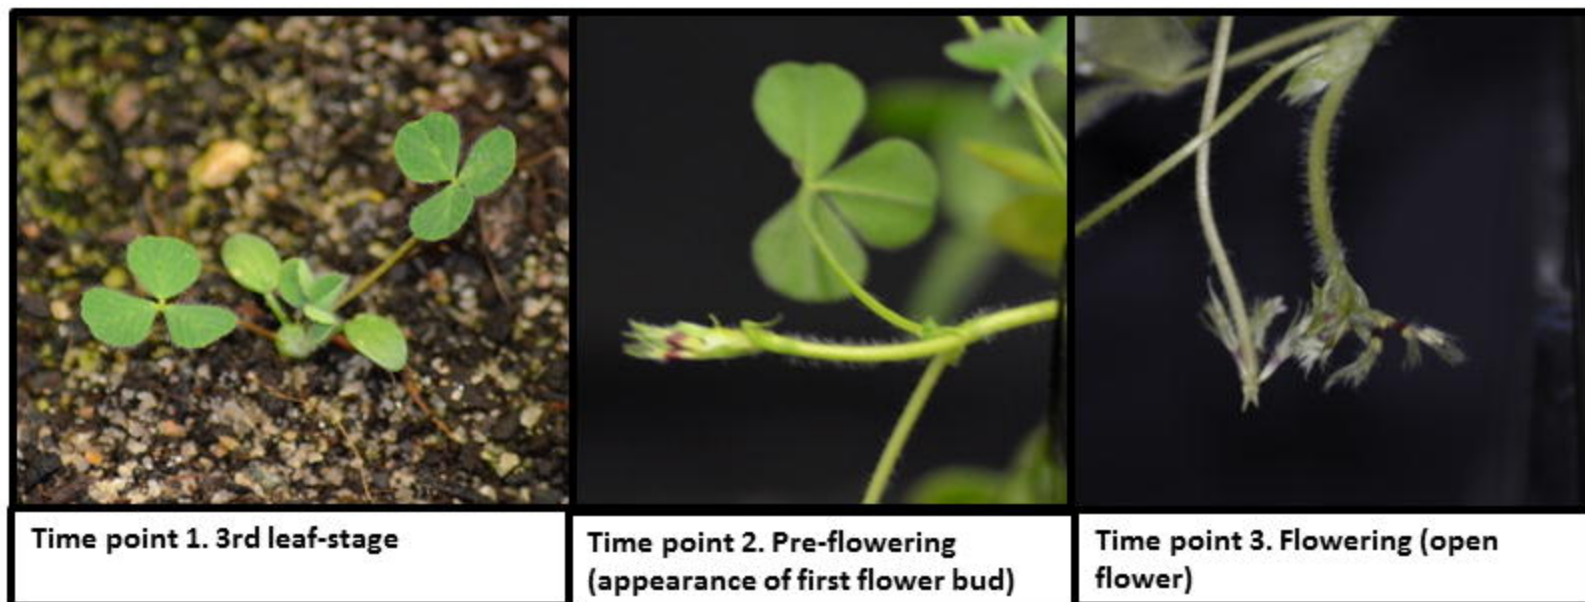

B

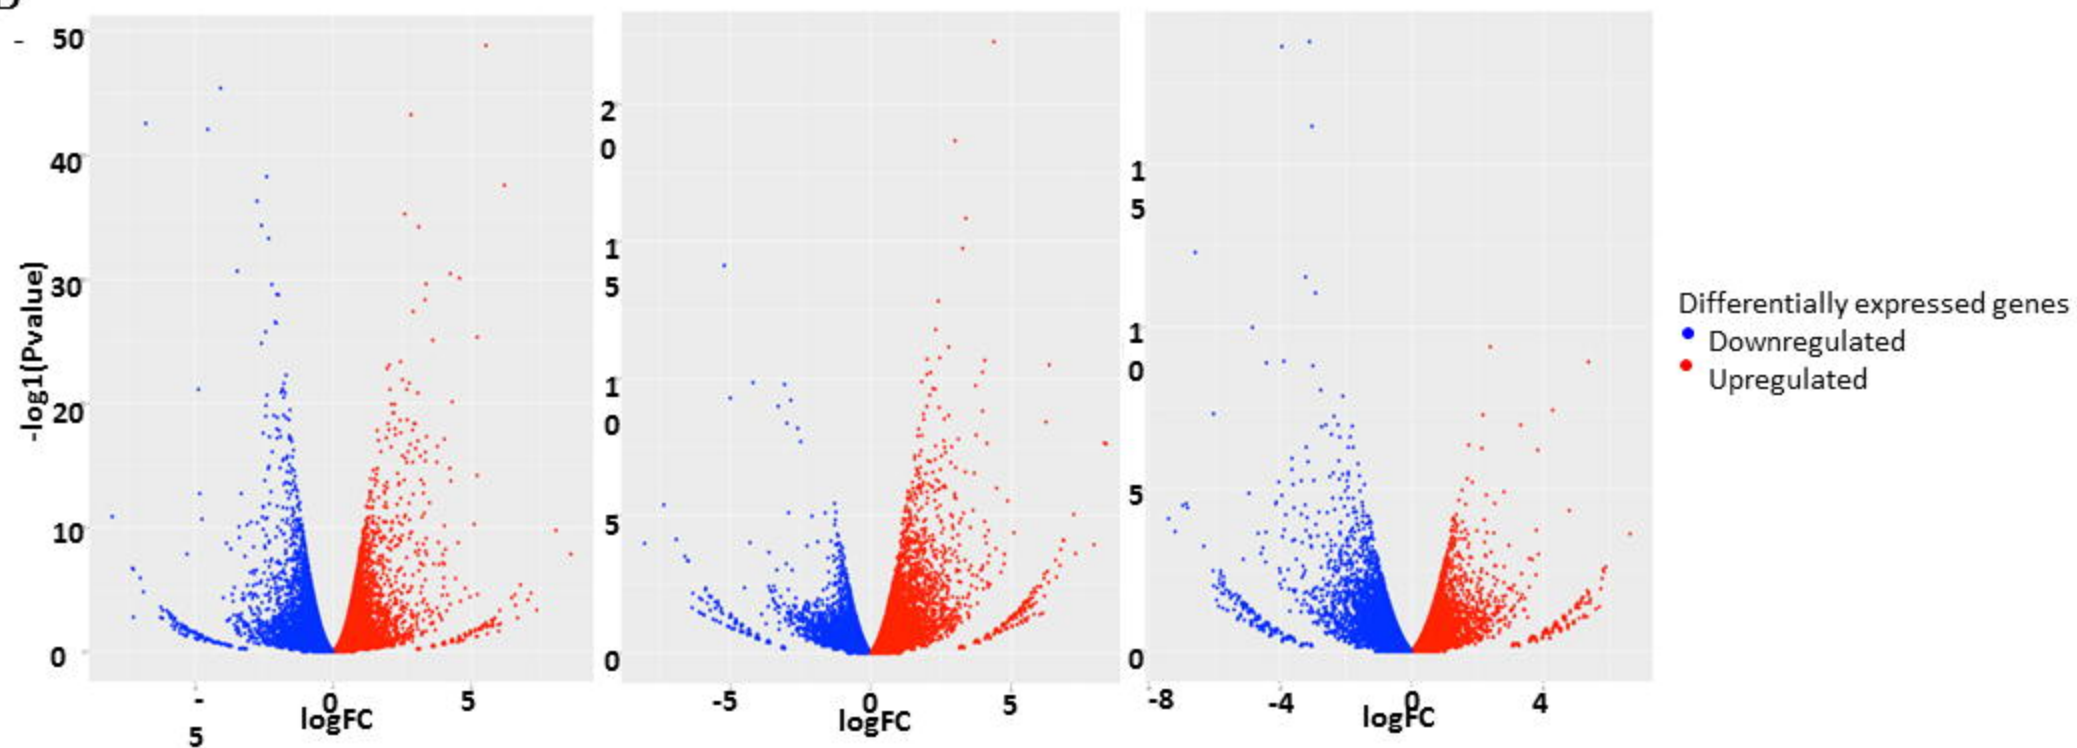

A

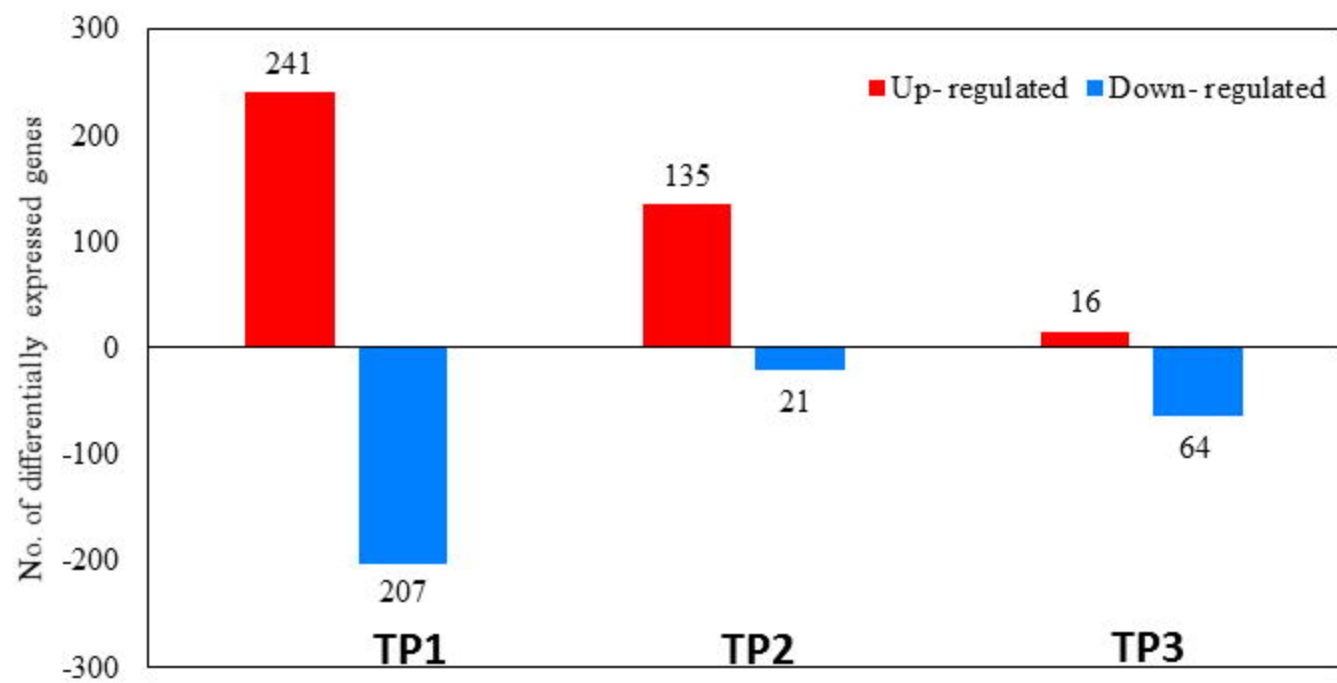

B

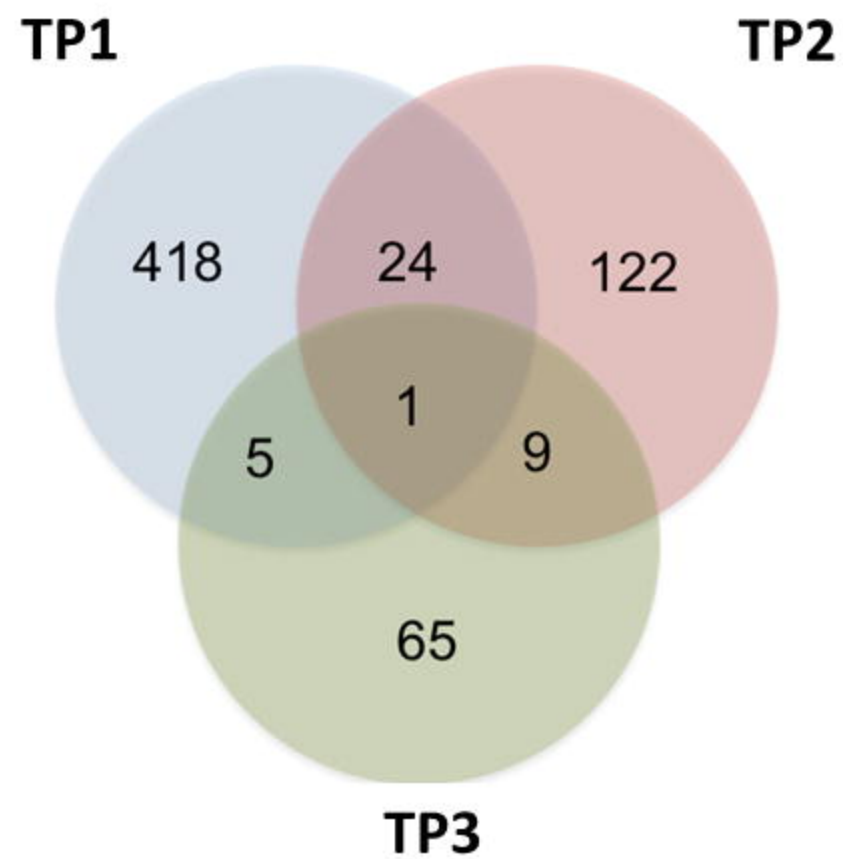

**A**  Down-regulated genes by Blue-enriched light

**TP1**

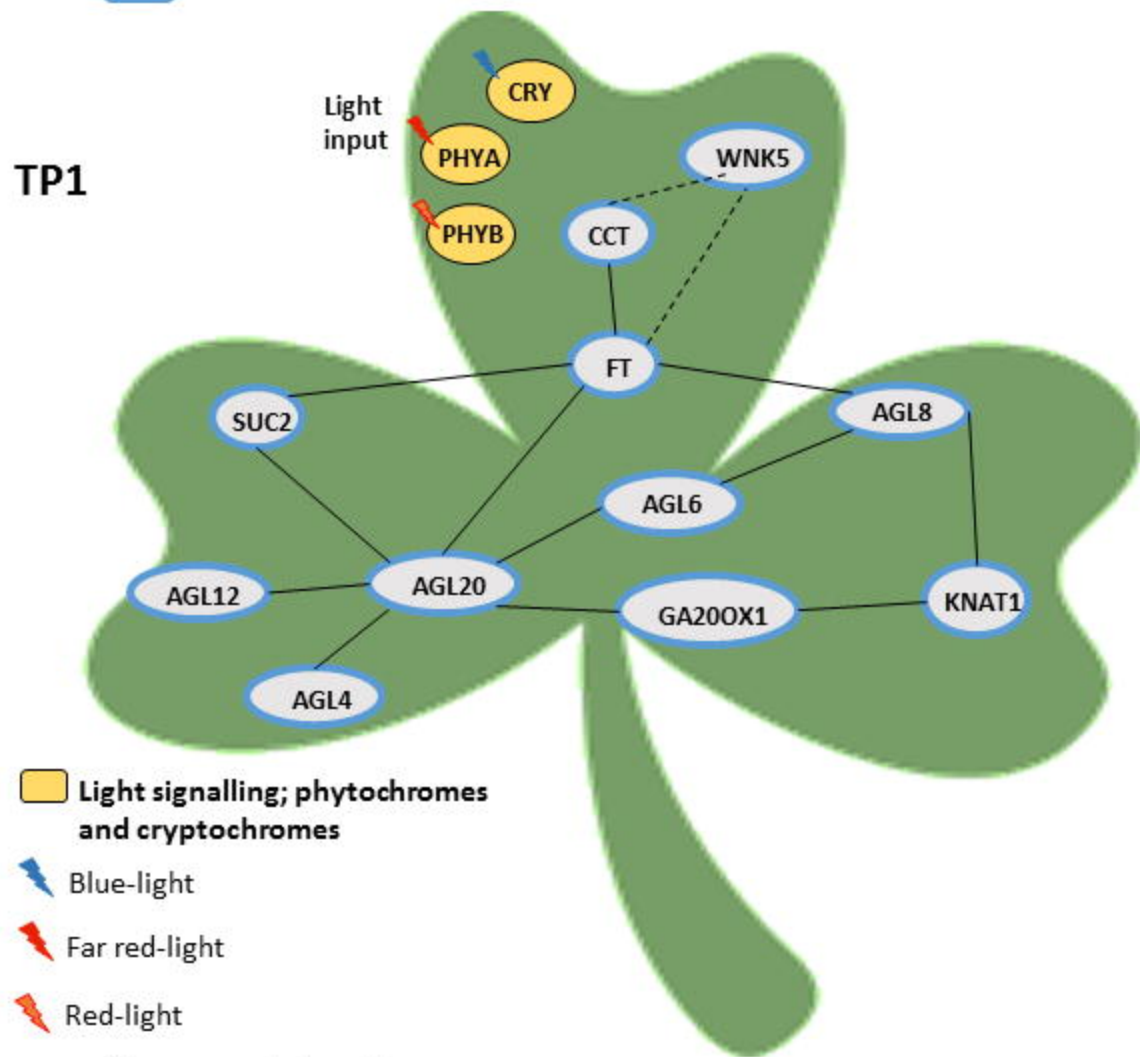

 Light signalling; phytochromes and cryptochromes

 Blue-light

 Far red-light

 Red-light

— Known gene interactions

- - - - - Hypothetical gene interactions

**B**  Up-regulated genes by Blue light-enriched light

**TP2**

**TP3**

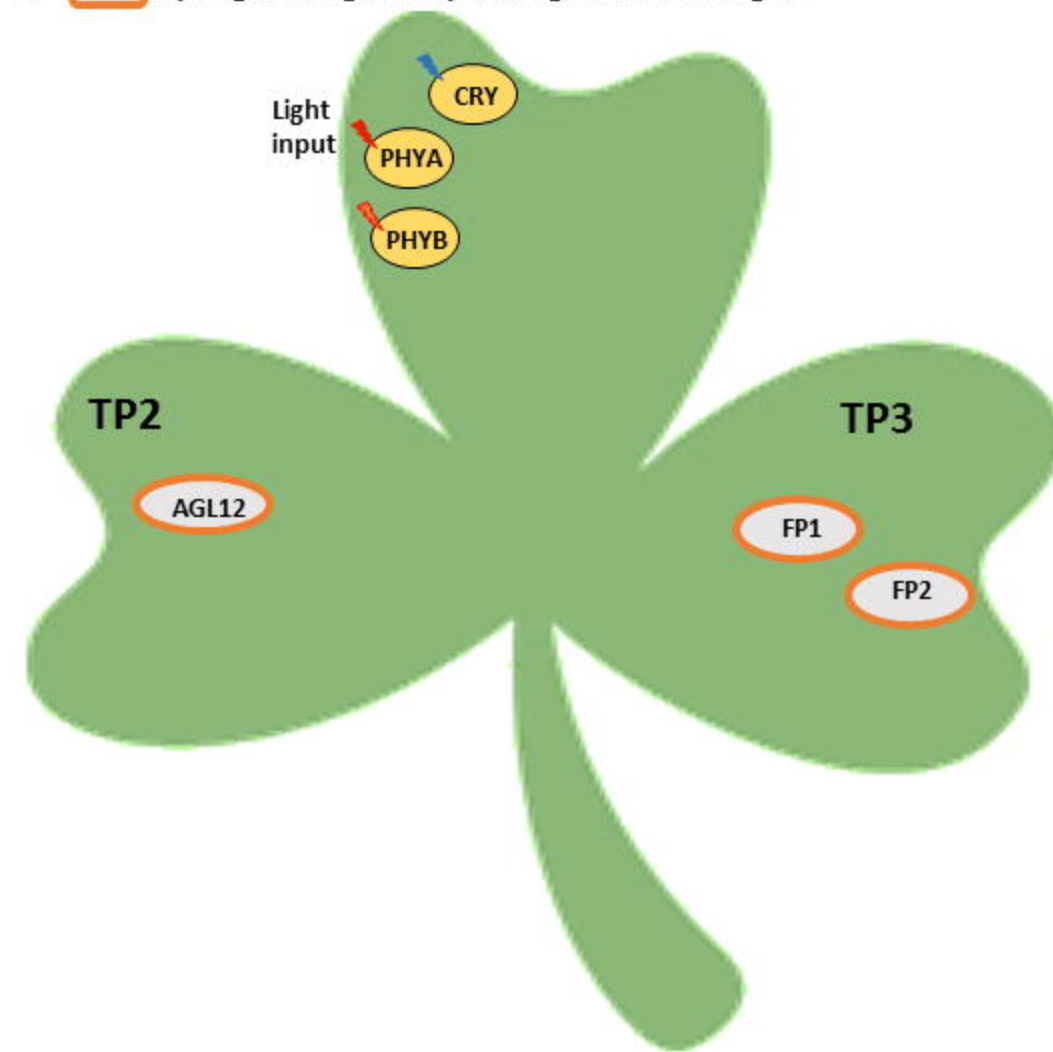

Source: https://www.biorxiv.org/content/10.1101/234161v1.full.pdf
